# Supplementary material
Source: publisher figshare collection journal article supplement (https://acs.figshare.com/ndownloader/files/4562266)
Supplement: Supplementary file 1 [file 4562266]

## Supporting Information for:

### A Meaningful Analogue of Pentacene: Charge Transport, Polymorphs and Electronic Structures of Dihydrodiazapentacene

Qin Tang,<sup>1</sup> Dieqing Zhang,<sup>1</sup> Shenglong Wang,<sup>3</sup> Ning Ke,<sup>2</sup>  
Jianbin Xu,<sup>2</sup> Jimmy C. Yu,<sup>1</sup> Qian Miao<sup>1\*</sup>

<sup>1</sup>Department of Chemistry and <sup>2</sup>Department of Electronic Engineering,  
the Chinese University of Hong Kong, Shatin, Hong Kong, China

<sup>3</sup>Department of Chemistry, New York University, New York, USA

## Characterization of DHDAP and DAP

<sup>1</sup>H-NMR spectra were recorded on a Bruker DPX 300MHz or Bruker AVANCE III 400MHz spectrometer. Mass spectra were recorded on Thermo Finnigan MAT 95 XL spectrometer.

**6,13-diazapentacene (DAP):** <sup>1</sup>H-NMR (DMSO-d<sub>6</sub>, 100°C) δ(ppm): 9.02(s, 4H), 8.21(m, 4H), 7.56 (m, 4H). HRMS (EI): cald. for C<sub>20</sub>H<sub>12</sub>N<sub>2</sub>: 280.1000, found 280.0995.

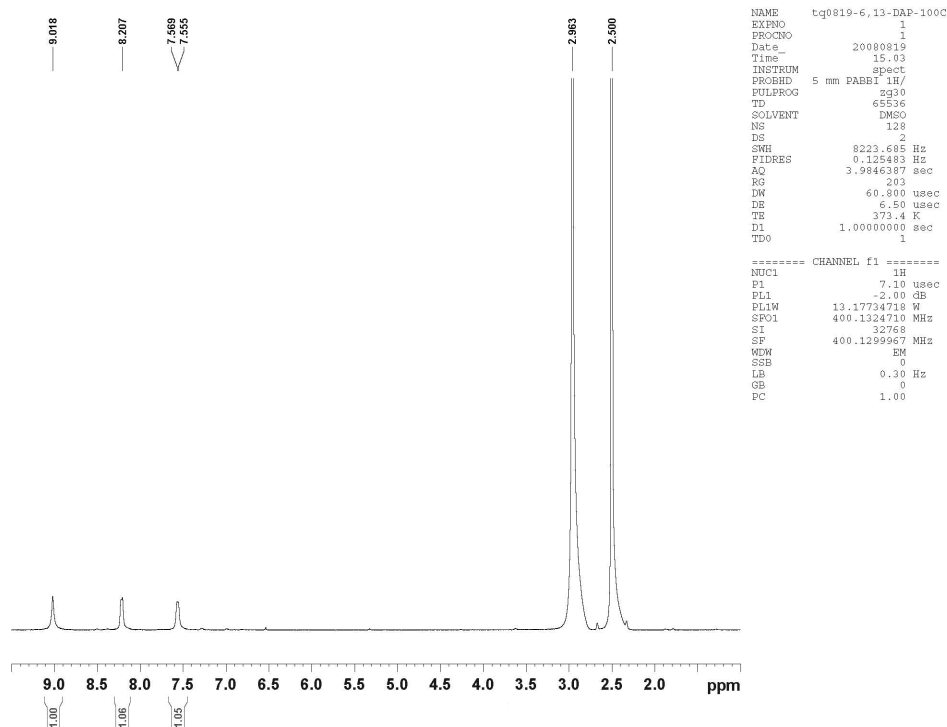

<sup>1</sup>H-NMR of DAP (DMSO-d<sub>6</sub>, 100°C)

## Environmental stability of DHDAP in DMSO-d<sub>6</sub> monitored by <sup>1</sup>H NMR:

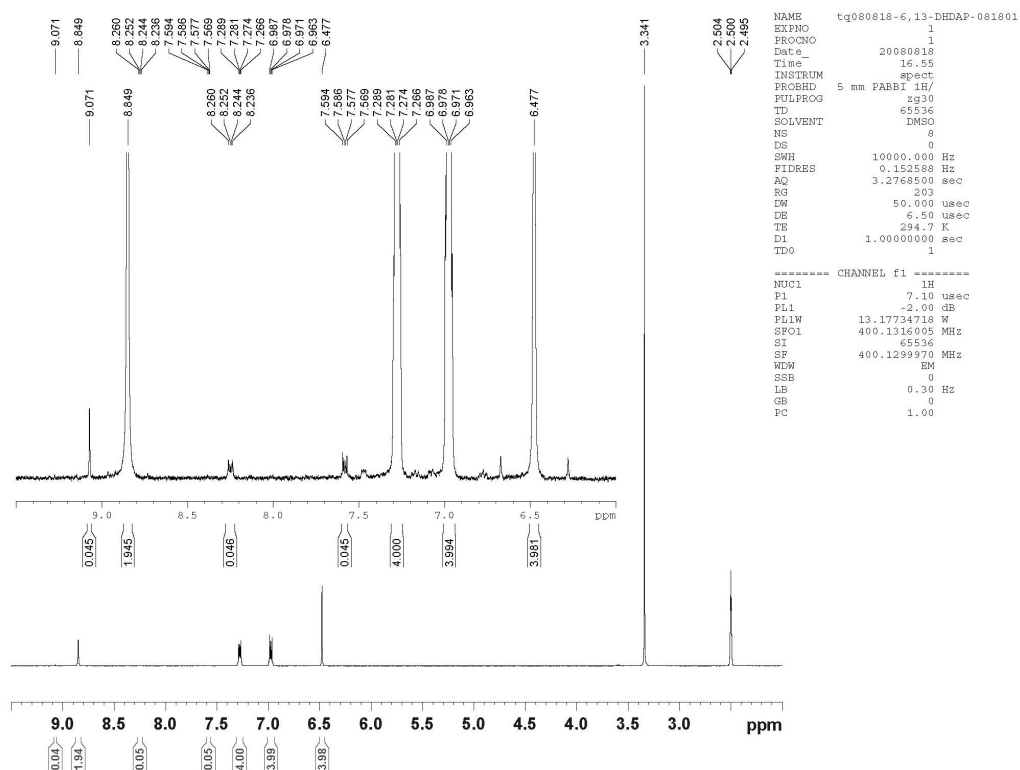

<sup>1</sup>H-NMR of a freshly prepared solution of DHDAP in DMSO-d<sub>6</sub>

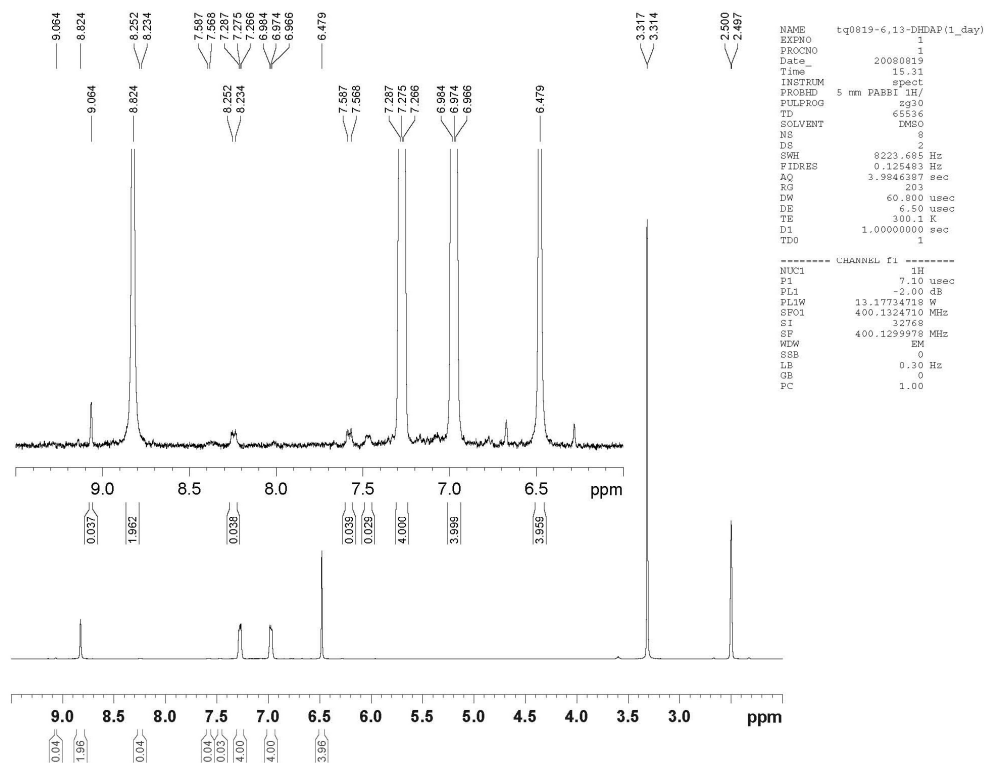

<sup>1</sup>H-NMR of a solution of DHDAP in DMSO-d<sub>6</sub> exposed to air and ambient light for 1 day

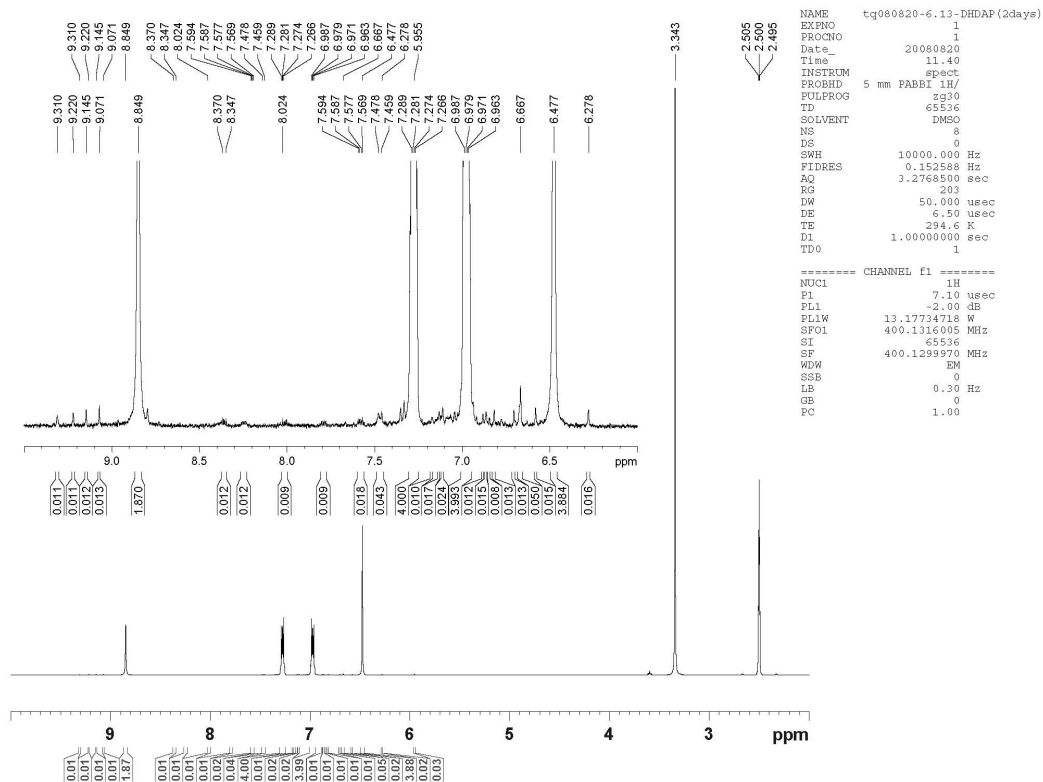

<sup>1</sup>H-NMR of a solution of DHDAP in DMSO-d<sub>6</sub> exposed to air and ambient light for 2 days

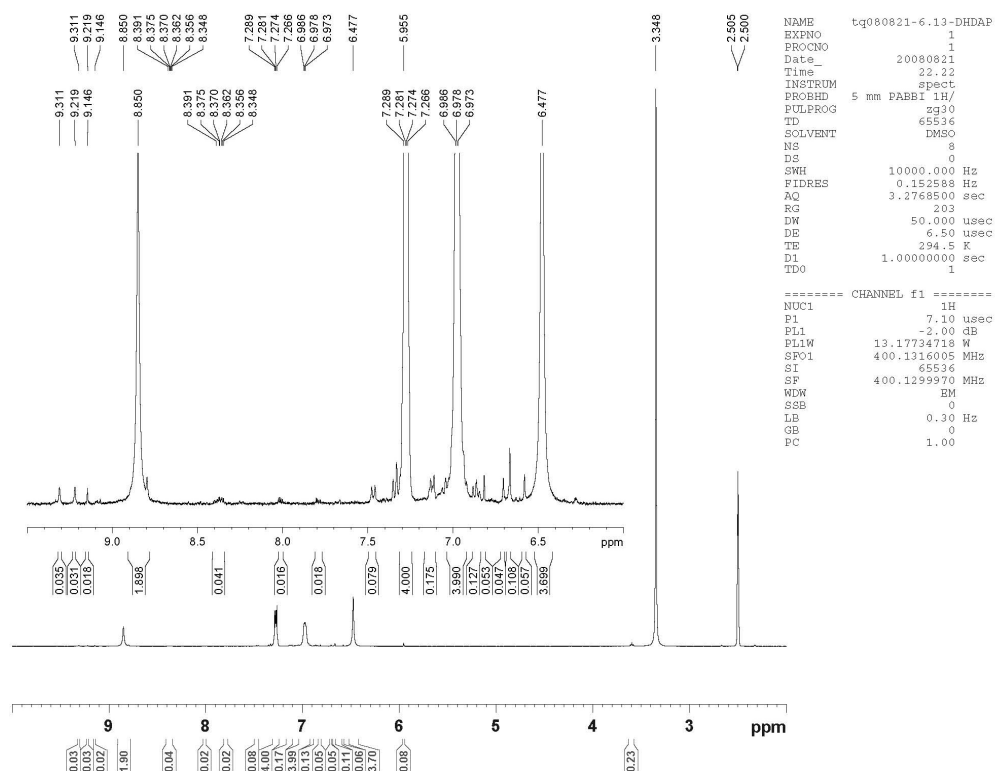

<sup>1</sup>H-NMR of a solution of DHDAP in DMSO-d<sub>6</sub> exposed to air and ambient light for 3 days

## **SiO<sub>2</sub> surface modification with OTS**

An oxidized silicon wafer (Si is highly n-doped with resistivity smaller than 0.005  $\Omega\cdot\text{cm}$  and the thermally grown SiO<sub>2</sub> is 300nm thick) was used as substrates for organic thin film transistors. The following surface treatments of the SiO<sub>2</sub> were performed on the dielectric surface before vacuum sublimation of the semiconductor film: a 10 min sonication in acetone, followed by a 70:30 H<sub>2</sub>SO<sub>4</sub>/H<sub>2</sub>O<sub>2</sub> (piranha) etch for 1 hour at 100°C, then a 1:1:5 NH<sub>3</sub>:H<sub>2</sub>O/H<sub>2</sub>O<sub>2</sub>/deionized H<sub>2</sub>O wash for 20 min at 70°C, and finally a soak in a 2.5mM solution of octadecyltrichlorosilane (OTS) in toluene at 28°C for 1 hour. The dielectric surface was characterized using contact angle measurements, which were <5° after cleaning and >105° after OTS monolayer formation. The contact angle of the OTS monolayer confirms a tight-packed hydrophobic surface.

## **Transistor fabrication, capacitance measurement, and transistor measurements**

The thin films composed of DHDAP and pentacene were vacuum-deposited by an Edwards Auto 306 vacuum coater with the Turbomolecular pump at a pressure of  $2.0 \times 10^{-6}$  Torr or lower, with a deposition rate of ca. 1Å/s to the desired thickness. During vacuum deposition the distance between source and substrate was 18 cm. Different substrate temperatures for deposition were achieved using a radiant heater and measured with a thermocouple. Top-contact drain and source gold electrodes were vacuum-deposited through a shadow mask onto the films of DHDAP in the same vacuum chamber, and the resulting semiconducting channels were 50 $\mu\text{m}$ (L) $\times$ 1mm(W), 100 $\mu\text{m}$ (L) $\times$ 1mm(W), 50 $\mu\text{m}$ (L) $\times$ 2mm(W) and 100 $\mu\text{m}$ (L) $\times$ 2mm(W). In these transistors highly n-doped silicon functioned as gate electrode and SiO<sub>2</sub> of 300nm thick (untreated or treated with octadecyl trichlorosilane) functioned as dielectrics.

The current-voltage measurement for thin-film transistors was carried out on a probe station using a HP 4145B semiconductor parameter analyzer. During the measurement, the samples were kept at room temperature in the ambient atmosphere.

## **Characterization of thin films**

UV-visible spectra were taken on a Virian Cary 1E UV-Visible Spectrophotometer. X-ray diffraction (XRD) patterns were collected on a Bruker D8 Advance Diffractometer with high-intensity Cu K $\alpha$ 1 irradiation ( $\lambda=1.5406\text{\AA}$ ). X-ray crystallography was taken on a Bruker KAPPA APEX2 with Mo irradiation ( $\lambda=1.71073\text{\AA}$ ).

Thin films of DHDAP (ca. 40 nm and 8 nm thick) on OTS treated and bare SiO<sub>2</sub>/Si were used for AFM studies. The topographic images were obtained using a Nanoscope IIIa Multimode Microscope from Digital Instruments. All AFM images were collected using tapping mode and in air under ambient conditions. The topographic images were collected from multiple samples, and for each sample, different regions were scanned to ensure the reproducibility.

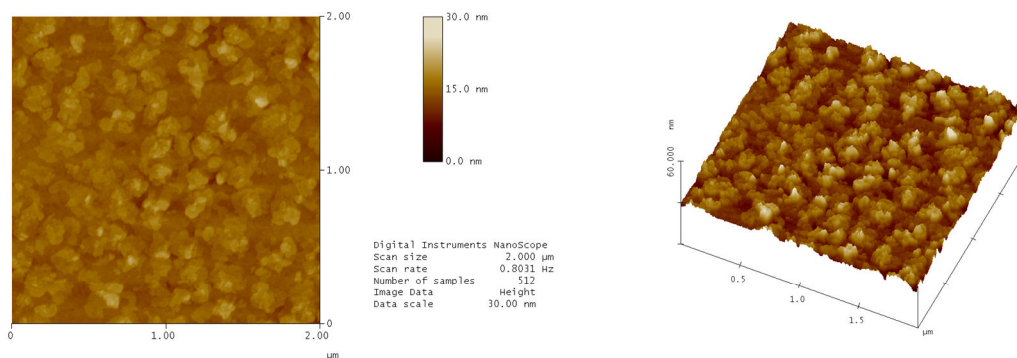

8 nm thick film of DHDAP deposited on bare SiO<sub>2</sub> at 25°C

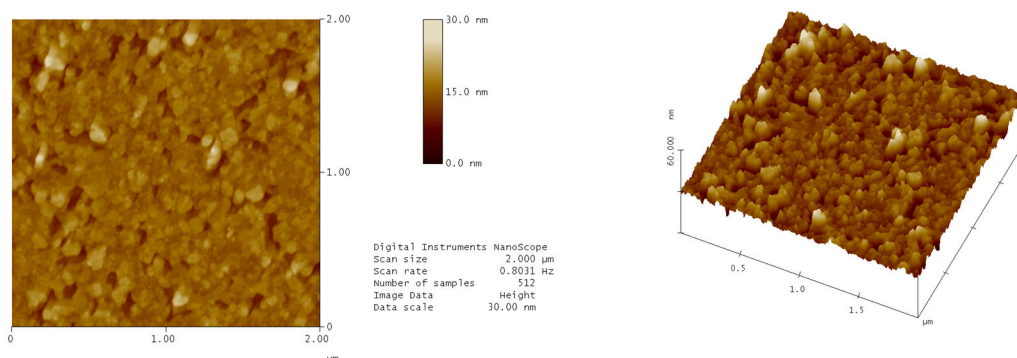

8 nm thick film of DHDAP deposited on OTS-treated SiO<sub>2</sub> at 25°C

AFM images of thin films of DHDAP (ca. 8nm thick) vacuum deposited on bare SiO<sub>2</sub> and OTS-treated SiO<sub>2</sub> substrates that were held at 25 °C.

## Cyclic Voltammetry

The cyclic voltammetry was performed in a saturated solution in anhydrous DMF with 0.1M tetrabutylammonium hexafluorophosphate (Bu<sub>4</sub>NPF<sub>6</sub>) as the supporting electrolyte, at a scan rate of 50mv s<sup>-1</sup>. A platinum bead is used as a working electrode, with a platinum disc as an auxiliary electrode and a silver rod is used as a pseudo-reference. Bis(cyclopentadienyl)cobalt(III) hexafluorophosphate (CoCp<sub>2</sub><sup>+</sup>/CoCp<sub>2</sub><sup>0</sup> is -1.35V vs. FeCp<sub>2</sub><sup>+</sup>/FeCp<sub>2</sub><sup>0</sup>) was used as the internal standard because the oxidation potential of DHDAP is very close to FeCp<sub>2</sub><sup>+</sup>/FeCp<sub>2</sub><sup>0</sup> (FeCp<sub>2</sub>: ferrocene). Potentials were referenced to FeCp<sub>2</sub><sup>+</sup>/FeCp<sub>2</sub><sup>0</sup>.

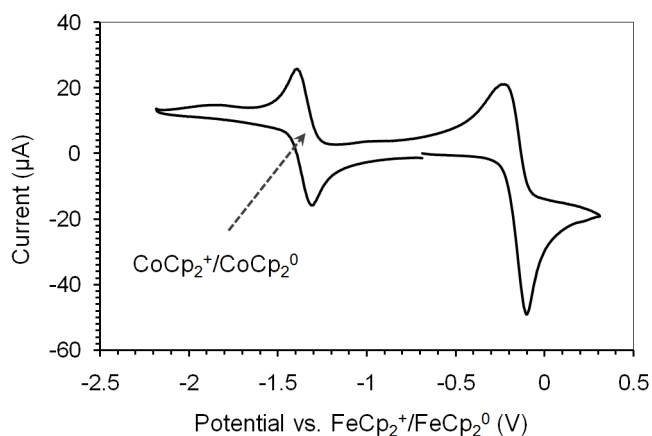

Electrochemical potentials (vs.  $\text{FeCp}_2^+/\text{FeCp}_2^0$ ) and estimated HOMO energy for DHDAP.

| $E_{\text{pc}}$ (V) | $E_{\text{pa}}$ (V) | $E_{1/2}$ (V) | HOMO (eV) |
|---------------------|---------------------|---------------|-----------|
| -0.237              | -0.104              | -0.171        | -4.63     |

$E_{\text{pc}}$ : cathodic peak potential;  $E_{\text{ac}}$ : anodic peak potential;  $E_{1/2}$ : half-wave potential
